# Supplementary material for: The influence of chronic stress reflected in demographic characteristics on perceived stress and depression––Evidence from hospital employees
Source: Research Square preprint supplement (doi:10.21203/rs.3.rs-7532487/v1), 2025-10-08
Supplement: Supplementary file 1 [file 44614ee1a728ac2883be84d8.pdf]

Figure. S1 The distribution the total score of PHQ-10 and PSS-14.

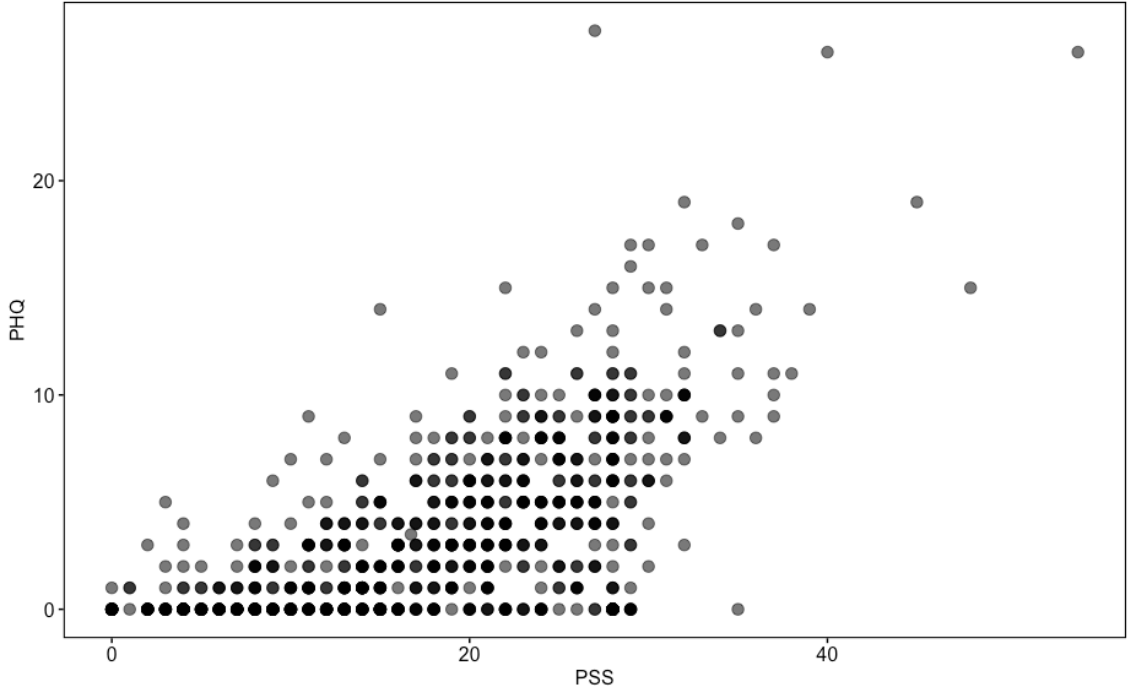

Figure. S2 The data distribution grouped by participants' characteristics.

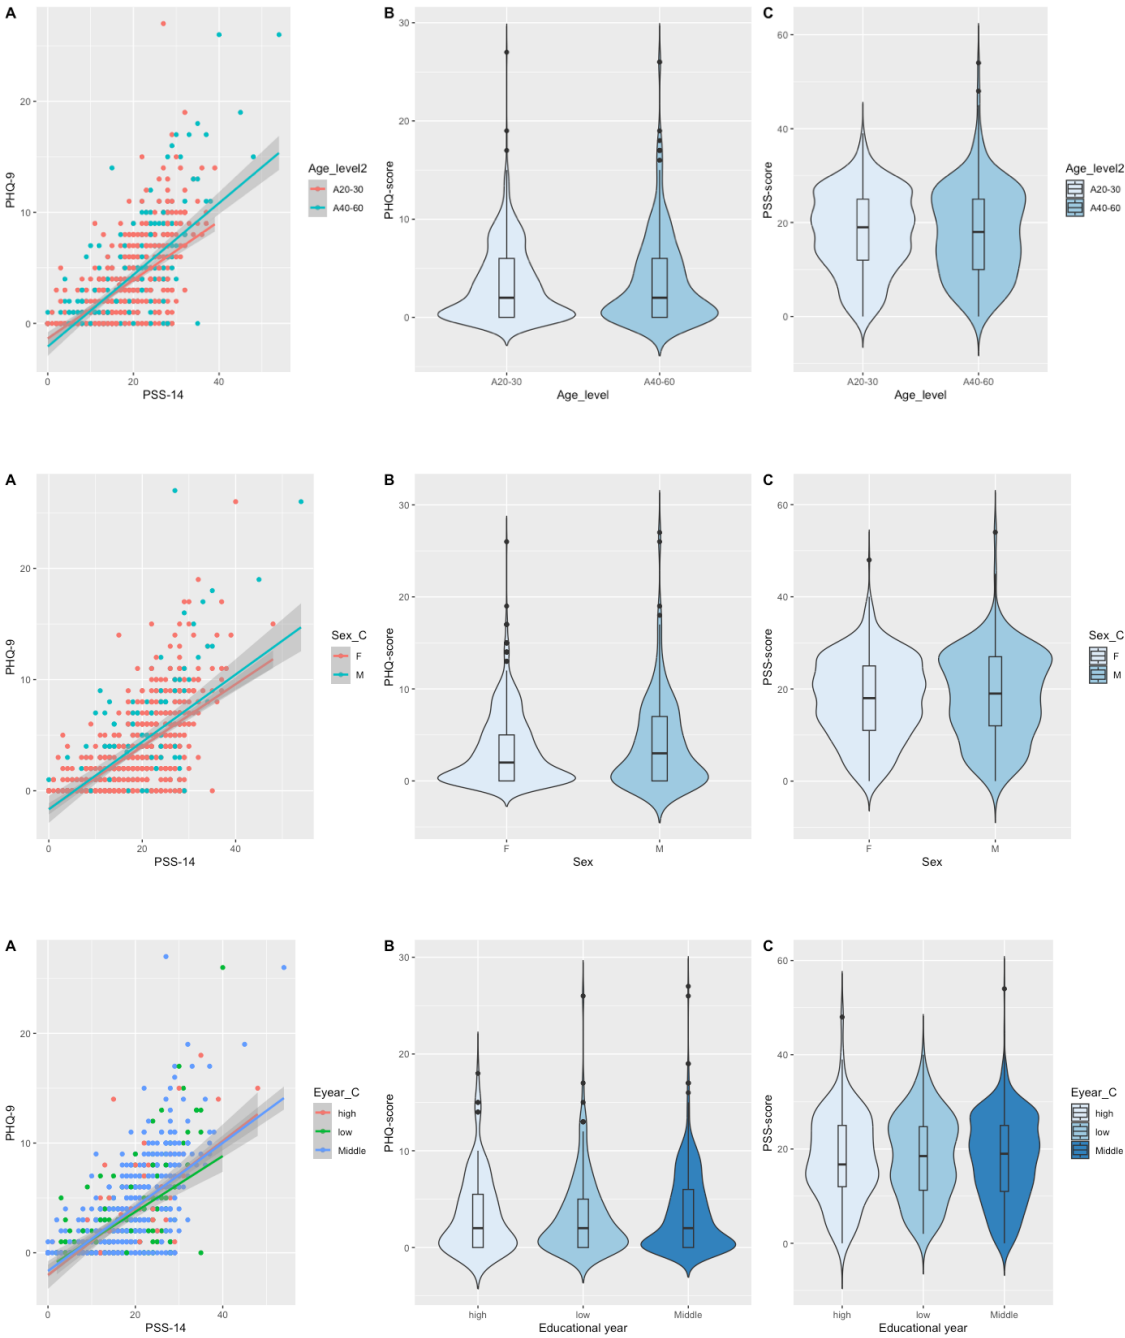

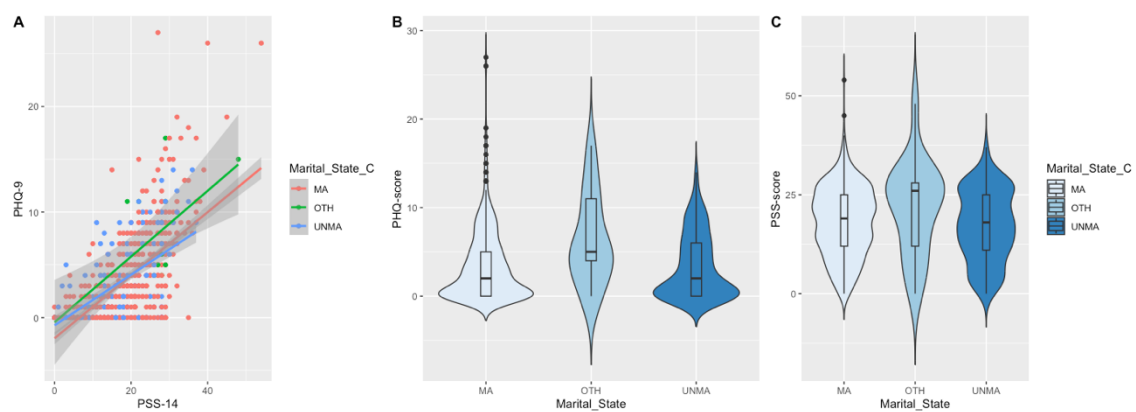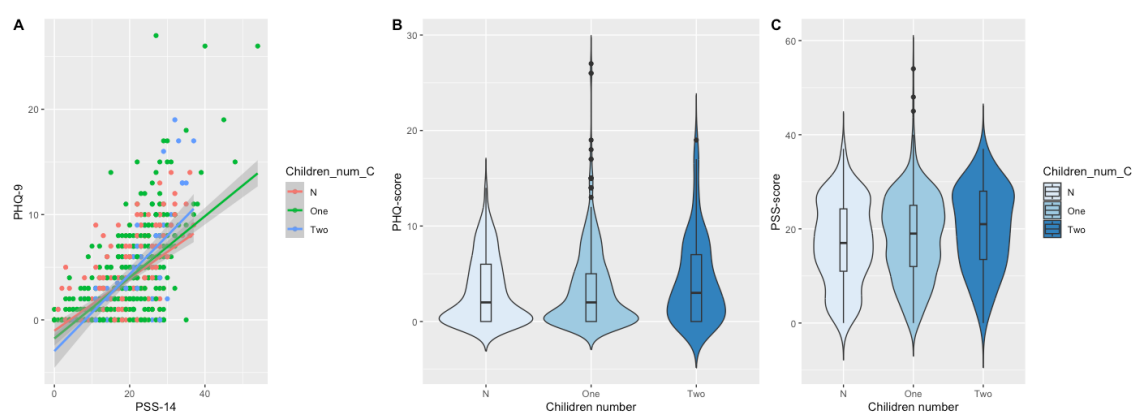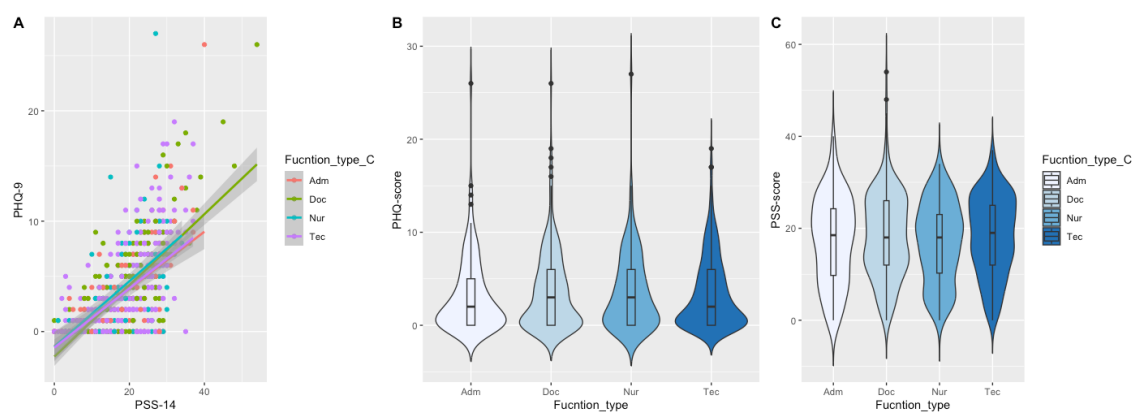

Table. S1 The increment effect of participants' characteristics on the total score of PHQ-9.

|                     | Model1   | Model2   | Model3   | Model4   | Model5   | Model6   |
|---------------------|----------|----------|----------|----------|----------|----------|
| (Intercept)         | 1.22 *** | 1.20 *** | 1.17 *** | 1.07 *** | 1.06 *** | 0.93 **  |
| Age_level2A40-60    | -0.07    | -0.07    | -0.17    | -0.24    | -0.25    | -0.30    |
|                     | 0.09     | 0.07     | 0.09     | 0.11     | 0.07     | 0.05     |
|                     | -0.12    | -0.12    | -0.12    | -0.13    | -0.14    | -0.14    |
| Sex_CM              |          | 0.13     | 0.12     | 0.15     | 0.17     | 0.15     |
|                     |          | -0.14    | -0.14    | -0.16    | -0.16    | -0.16    |
| Eyear_Clow          |          |          | -0.05    | -0.07    | -0.06    | -0.07    |
|                     |          |          | -0.21    | -0.25    | -0.25    | -0.25    |
| Eyear_CMiddle       |          |          | 0.05     | 0.02     | 0.02     | 0.02     |
|                     |          |          | -0.17    | -0.20    | -0.20    | -0.20    |
| Fucntion_type_CDoc  |          |          |          | 0.08     | 0.08     | 0.07     |
|                     |          |          |          | -0.20    | -0.20    | -0.21    |
| Fucntion_type_CNur  |          |          |          | 0.13     | 0.12     | 0.12     |
|                     |          |          |          | -0.22    | -0.22    | -0.22    |
| Fucntion_type_CTec  |          |          |          | 0.14     | 0.15     | 0.13     |
|                     |          |          |          | -0.18    | -0.18    | -0.18    |
| Marital_State_COTH  |          |          |          |          | 0.59     | 0.62     |
|                     |          |          |          |          | -0.40    | -0.40    |
| Marital_State_CUNMA |          |          |          |          | -0.02    | 0.14     |
|                     |          |          |          |          | -0.14    | -0.22    |
| Children_num_COne   |          |          |          |          |          | 0.14     |
|                     |          |          |          |          |          | -0.20    |
| Children_num_CTwo   |          |          |          |          |          | 0.36     |
|                     |          |          |          |          |          | -0.25    |
| AIC                 | 2857.97  | 2859.04  | 2862.58  | 2867.95  | 2869.34  | 2871.04  |
| BIC                 | 2876.83  | 2882.62  | 2895.58  | 2915.1   | 2925.93  | 2937.05  |
| Log Likelihood      | -1424.99 | -1424.52 | -1424.29 | -1423.97 | -1422.67 | -1421.52 |
| Num.obs.            | 825      | 825      | 825      | 825      | 825      | 825      |
| Num.groups: No      | 825      | 825      | 825      | 825      | 825      | 825      |
| Var: No (Intercept) | 0.00     | 0.00     | 0.00     | 0.00     | 0.00     | 0.00     |
| Var: esidual        | 1.31     | 1.29     | 1.3      | 1.3      | 1.3      | 1.3      |

\*\*\* $p < .001$ ; \*\* $p < .01$ ; \* $p < .05$

Table. S2 The increment effect of participants' characteristics on the total score of PSS-14.

|                     | Model1   | Model2   | Model3   | Model4   | Model5   | Model6   |
|---------------------|----------|----------|----------|----------|----------|----------|
| (Intercept)         | 2.89 *** | 2.88 *** | 2.87 *** | 2.83 *** | 2.85 *** | 2.79 *** |
|                     | -0.03    | -0.03    | -0.08    | -0.11    | -0.11    | -0.14    |
| Age_level2A40-60    | 0.00     | -0.01    | -0.01    | -0.01    | -0.04    | -0.05    |
|                     | -0.05    | -0.06    | -0.06    | -0.06    | -0.06    | -0.06    |
| Sex_CM              |          | 0.03     | 0.03     | 0.05     | 0.06     | 0.05     |
|                     |          | -0.06    | -0.06    | -0.07    | -0.07    | -0.07    |
| Eyear_Clow          |          |          | 0.03     | 0.03     | 0.03     | 0.03     |
|                     |          |          | -0.09    | -0.11    | -0.11    | -0.11    |
| Eyear_CMiddle       |          |          | 0.01     | 0.01     | 0.01     | 0.01     |
|                     |          |          | -0.08    | -0.09    | -0.09    | -0.09    |
| Fucntion_type_CDoc  |          |          |          | 0.05     | 0.05     | 0.04     |
|                     |          |          |          | -0.09    | -0.09    | -0.09    |
| Fucntion_type_CNur  |          |          |          | -0.02    | -0.04    | -0.04    |
|                     |          |          |          | -0.10    | -0.10    | -0.10    |
| Fucntion_type_CTec  |          |          |          | 0.07     | 0.07     | 0.06     |
|                     |          |          |          | -0.08    | -0.08    | -0.08    |
| Marital_State_COTH  |          |          |          |          | 0.21     | 0.23     |
|                     |          |          |          |          | -0.18    | -0.18    |
| Marital_State_CUNMA |          |          |          |          | -0.08    | -0.01    |
|                     |          |          |          |          | -0.06    | -0.10    |
| Children_num_COne   |          |          |          |          |          | 0.07     |
|                     |          |          |          |          |          | -0.09    |
| Children_num_CTwo   |          |          |          |          |          | 0.16     |
|                     |          |          |          |          |          | -0.11    |
| AIC                 | 6279.99  | 6281.73  | 6285.64  | 6289.98  | 6291.09  | 6292.95  |
| BIC                 | 6298.85  | 6305.31  | 6318.64  | 6337.14  | 6347.67  | 6358.97  |
| Log Likelihood      | -3136    | -3135.87 | -3135.82 | -3134.99 | -3133.54 | -3132.48 |
| Num.obs.            | 825      | 825      | 825      | 825      | 825      | 825      |
| Num.groups: No      | 825      | 825      | 825      | 825      | 825      | 825      |
| Var: No (Intercept) | 0.00     | 0.00     | 0.00     | 0.00     | 0.00     | 0.00     |
| Var: esidual        | 0.25     | 0.25     | 0.25     | 0.25     | 0.25     | 0.25     |

\*\*\* $p < .001$ ; \*\* $p < .01$ ; \* $p < .05$
